# Supplementary material for: Measurement of bovine (Bos taurus) serum albumin by different methods and the comparison of protein fractions determined by capillary zone electrophoresis and agarose gel electrophoresis
Source: PeerJ. 2025 Aug 5;13:e19685. doi: 10.7717/peerj.19685 (PMC12333604; doi:10.7717/peerj.19685)
Supplement: Supplemental Information 1 [file peerj-13-19685-s001.xlsx]

## Sheet: Comparison Methods Albumin
Case ID	Total Pr	Alb BCP	Alb BCG	Alb CZE	Alb AGE
1	8.5	3.22	3.1	2.77	2.87
2	7.8	3.41	3.2	2.99	3.17
3	8	3.57	3.3	3.23	3.3
4	7.5	3.54	3.3	3.44	3.36
5	8	3.65	3.5	3.29	3.3
6	8.1	4.18	3.2	2.89	2.93
7	7.5	3.57	3.2	3.11	3.58
8	6.9	3.31	2.9	3.07	3.12
9	7.6	3.06	3	2.98	3.12
10	7.3	3.04	3.1	3.23	3.33
11	7.7	3.14	3.2	3.16	3.47
12	7.4	3.12	3.1	3.22	3.5
13	7.6	3.37	3.2	3.24	3.45
14	6.6	3.12	2.8	2.86	2.94
15	7.9	3.34	3.2	2.92	3.16
16	7.4	3.26	3.1	2.89	3.29
17	8	2.62	3.1	3.05	3.31
18	7.9	2.96	3.1	2.99	3.14
19	7	3.15	2.7	2.64	2.93
20	7	2.59	2.7	2.75	2.96
21	7.6	3.15	3.1	2.92	3.37
22	7.6	2.8	2.9	3.05	3.12
23	7.9	3.72	3.6	3.47	3.54
24	7.4	3.23	2.8	2.6	2.93
25	7.3	3.14	2.9	3.11	3.39
26	6.8	2.53	2.5	2.64	2.78
27	7.6	3.08	2.9	2.81	2.93
28	7.5	3.33	3	3	3.11
29	7.1	3.57	3	3.09	3.23
30	7	3.34	2.9	2.82	2.97
31	6	2.72	2.3	2.35	2.51
32	6.7	3.25	2.8	2.76	2.94
33	5.2	1.87	1.9	2.06	2.23
34	6.9	3.12	2.8	3.05	3.12
35	7.5	3.15	3.2	3.21	3.48
36	6.4	3	2.6	2.7	2.92
37	4.3	1.93	1.7	1.83	2.04
38	6.1	2.8	2.4	2.53	2.87
39	7.1	2.98	2.9	2.89	3.45
40	7.7	3.32	3	2.89	3.01
41	6.4	2.89	2.5	2.63	2.71
42	6.2	2.52	2.2	2.41	2.49
43	6.6	2.89	2.7	2.96	3.15
44	6.4	3.06	2.6	2.88	3.05
45	6.7	2.48	2.3	2.19	2.39
46	10.3	4.36	4.7	4.27	4.47
47	7.4	3.23	3.1	3.23	3.29
48	6.8	3.17	2.7	2.87	2.91
49	7.1	3.07	2.8	2.76	2.9
50	7.6	3.54	3.2	3.22	3.33
51	8.4	3.61	3.6	3.69	3.8
52	6.7	3.24	2.7	2.69	2.89
53	8.3	3.27	3.2	2.9	2.95
54	8.4	3.46	3.4	3.47	3.56
55	8.8	3.36	3.3	2.78	2.97

## Sheet: Comparison methods CZE x AGE
	CZE											AGE
Case ID	CZE A/G ratio	CZE Albumin	CZE Albumi (%)	Alpha 1	Alpha 1 (%)	Alpha 2	Alpha 2 (%)	Beta total	Beta total (%)	Gamma	Gamma (%)	A/G ratio	Albumi (%)	Albumin	Alpha1 (%)	Alpha 1	Alpha2 (%)	Alpha 2	Beta (%)	Beta	Gamma (%)	Gamma
1	0.48	2.77	32.6	0.05	0.6	1.61	18.9	0.83	9.7	3.25	38.2	0.51	33.8	2.87	8.3	0.71	9.7	0.82	8.9	0.76	39.4	3.35
2	0.62	2.99	38.4	0.07	0.9	1.27	16.3	0.74	9.5	2.72	34.9	0.68	40.6	3.17	7.4	0.58	8.7	0.68	9.8	0.76	33.4	2.61
3	0.68	3.23	40.4	0.1	1.2	1.24	15.5	0.86	10.7	2.58	32.2	0.7	41.2	3.3	7	0.56	8.9	0.71	11.4	0.91	31.6	2.53
4	0.85	3.44	45.8	0.09	1.2	1.14	15.2	0.77	10.2	2.07	27.6	0.81	44.8	3.36	7.7	0.58	9	0.68	10.7	0.8	27.8	2.09
5	0.7	3.29	41.1	0.11	1.4	1.14	14.3	1.01	12.6	2.45	30.6	0.7	41.3	3.3	8.3	0.66	8.2	0.66	12.6	1.01	29.5	2.36
6	0.56	2.89	35.7	0.07	0.9	1.23	15.2	1.01	12.5	2.89	35.7	0.57	36.2	2.93	9.1	0.74	7.4	0.6	13	1.05	34.3	2.78
7	0.71	3.11	41.5	0.12	1.6	1.14	15.2	1.03	13.7	2.1	28	0.91	47.7	3.58	5.7	0.43	8	0.6	13.8	1.03	24.8	1.86
8	0.8	3.07	44.5	0.08	1.1	1.14	16.5	0.74	10.7	1.88	27.2	0.82	45.2	3.12	8.7	0.6	8.5	0.59	10	0.69	27.7	1.91
9	0.65	2.98	39.3	0.07	0.9	1.09	14.4	0.9	11.8	2.55	33.6	0.69	41	3.12	7.2	0.55	7.9	0.6	10.8	0.82	33.2	2.52
10	0.79	3.23	44.2	0.07	0.9	1.12	15.3	0.73	10	2.16	29.6	0.84	45.6	3.33	8.3	0.61	8.8	0.64	10	0.73	27.3	1.99
11	0.7	3.16	41.1	0.07	0.9	1.22	15.9	0.83	10.8	2.41	31.3	0.82	45.1	3.47	7.2	0.55	8.3	0.64	9.9	0.76	29.5	2.27
12	0.77	3.22	43.6	0.07	0.9	1.1	14.8	0.82	11	2.2	29.7	0.9	47.3	3.5	6.4	0.47	7.8	0.58	9.9	0.73	28.5	2.11
13	0.74	3.24	42.7	0.05	0.7	1.03	13.5	0.88	11.6	2.39	31.5	0.83	45.4	3.45	6.6	0.5	8.4	0.64	11.3	0.86	28.4	2.16
14	0.76	2.86	43.3	0.05	0.7	1.05	15.9	0.78	11.8	1.87	28.3	0.8	44.5	2.94	8.1	0.53	8.7	0.57	11	0.73	27.8	1.83
15	0.59	2.92	36.9	0.07	0.9	1.11	14	1.09	13.9	2.71	34.3	0.67	40	3.16	6.4	0.51	8.6	0.68	11.6	0.92	33.4	2.64
16	0.64	2.89	39.1	0.07	0.9	1.03	13.9	0.92	12.4	2.49	33.7	0.8	44.4	3.29	5.7	0.42	7.3	0.54	11.6	0.86	31	2.29
17	0.62	3.05	38.1	0.06	0.8	1.06	13.3	1.04	13	2.78	34.8	0.71	41.4	3.31	5.3	0.42	6.9	0.55	12.8	1.02	33.7	2.7
18	0.61	2.99	37.9	0.08	1	1.15	14.5	0.61	7.7	3.07	38.9	0.66	39.8	3.14	7.2	0.57	8.3	0.66	8.5	0.67	36.3	2.87
19	0.61	2.64	37.7	0.06	0.9	1.06	15.2	0.85	12.2	2.38	34	0.72	41.8	2.93	6.6	0.46	7.4	0.52	11.6	0.81	32.7	2.29
20	0.65	2.75	39.3	0.06	0.8	1	14.3	0.76	10.9	2.43	34.7	0.73	42.2	2.96	6	0.42	7.6	0.53	10.7	0.75	33.6	2.35
21	0.62	2.92	38.4	0.07	0.9	1.09	14.4	0.95	12.5	2.57	33.8	0.79	44.4	3.37	4.9	0.37	7.7	0.59	10.5	0.8	32.6	2.48
22	0.67	3.05	40.2	0.05	0.7	1.09	14.3	0.63	8.3	2.77	36.5	0.7	41.1	3.12	5.7	0.43	9.3	0.71	8.7	0.66	35.2	2.68
23	0.78	3.47	43.9	0.06	0.8	1.29	16.3	1.05	13.3	2.03	25.7	0.81	44.8	3.54	8.5	0.67	9.9	0.78	12.2	0.96	24.5	1.94
24	0.54	2.6	35.1	0.1	1.3	1.06	14.3	1.05	14.1	2.6	35.2	0.66	39.6	2.93	5.6	0.41	7.8	0.58	12.5	0.93	34.5	2.55
25	0.74	3.11	42.6	0.07	0.9	1.04	14.3	0.86	11.8	2.22	30.4	0.87	46.5	3.39	5.6	0.41	7.8	0.57	11.6	0.85	28.5	2.08
26	0.64	2.64	38.8	0.07	1.1	0.86	12.6	0.66	9.8	2.56	37.7	0.69	40.9	2.78	5.3	0.36	7	0.48	9.8	0.67	37.1	2.52
27	0.59	2.81	37.1	0.09	1.2	1.15	15.1	0.91	12	2.63	34.6	0.63	38.5	2.93	8.4	0.64	7.9	0.6	9	0.68	36.2	2.75
28	0.67	3	39.9	0.09	1.2	0.95	12.6	0.98	13.1	2.49	33.2	0.71	41.4	3.11	4.5	0.00	8.6	0.65	10.7	0.8	34.8	2.61
29	0.77	3.09	43.5	0.06	0.9	1.03	14.5	0.82	11.5	2.1	29.6	0.83	45.5	3.23	8.9	0.63	7.1	0.5	11.8	0.84	26.8	1.9
30	0.67	2.82	40.2	0.04	0.6	0.96	13.7	0.77	11	2.42	34.5	0.74	42.4	2.97	7	0.49	6.9	0.48	11.2	0.78	32.6	2.28
31	0.64	2.35	39.2	0.06	1	0.89	14.8	0.6	10	2.1	35	0.72	41.9	2.51	7.1	0.43	7.7	0.46	9.7	0.58	33.5	2.01
32	0.7	2.76	41.1	0.07	1	1.07	16	0.73	10.9	2.08	31	0.78	43.9	2.94	7.8	0.52	7.7	0.52	9.7	0.65	31	2.08
33	0.66	2.06	39.6	0.05	0.9	0.7	13.4	0.53	10.3	1.86	35.8	0.75	42.9	2.23	5.9	0.31	7.2	0.37	8.9	0.46	35.2	1.83
34	0.79	3.05	44.2	0.05	0.7	0.91	13.2	0.73	10.6	2.16	31.3	0.82	45.2	3.12	6.7	0.46	7.3	0.5	8.4	0.58	32.5	2.24
35	0.75	3.21	42.8	0.05	0.7	1.07	14.2	0.69	9.2	2.48	33.1	0.87	46.4	3.48	4.9	0.37	7.7	0.58	8.8	0.66	32.2	2.42
36	0.73	2.7	42.1	0.04	0.7	1.11	17.3	0.65	10.1	1.91	29.8	0.84	45.7	2.92	7.7	0.49	9.5	0.61	9.3	0.6	27.8	1.78
37	0.74	1.83	42.4	0.03	0.8	0.62	14.5	0.42	9.7	1.4	32.6	0.9	47.5	2.04	5.2	0.22	7.2	0.31	7.7	0.33	32.5	1.4
38	0.71	2.53	41.4	0.04	0.7	0.84	13.8	0.69	11.3	2	32.8	0.89	47.1	2.87	5.6	0.34	6.6	0.4	9.3	0.57	31.4	1.92
39	0.69	2.89	40.7	0.07	1	1.16	16.4	0.87	12.2	2.11	29.7	0.94	48.6	3.45	5	0.36	7	0.5	12.4	0.88	27	1.92
40	0.6	2.89	37.6	0.08	1	1.22	15.9	0.83	10.7	2.68	34.8	0.64	39	3.01	8.1	0.62	8.5	0.65	9.6	0.74	34.7	2.67
41	0.7	2.63	41.2	0.1	1.5	1.03	16.1	0.75	11.8	1.88	29.4	0.74	42.4	2.71	7.9	0.51	9.7	0.62	10.7	0.68	29.3	1.88
42	0.63	2.41	38.9	0.06	1	0.89	14.3	0.69	11	2.16	34.8	0.67	40.2	2.49	7.7	0.48	7.4	0.46	10.5	0.65	34.1	2.11
43	0.81	2.96	44.8	0.07	1	0.92	13.9	0.7	10.6	1.96	29.7	0.91	47.8	3.15	5.9	0.39	7.9	0.52	9.3	0.61	29.1	1.92
44	0.82	2.88	45	0.08	1.2	0.93	14.5	0.72	11.3	1.79	28	0.91	47.6	3.05	6.8	0.44	8.5	0.54	11.3	0.72	25.9	1.66
45	0.49	2.19	32.7	0.05	0.8	0.93	13.9	0.75	11.2	2.77	41.4	0.55	35.6	2.39	7	0.47	7.6	0.51	8.2	0.55	41.6	2.79
46	0.71	4.27	41.4	0.09	0.9	1.55	15	1.09	10.6	3.31	32.1	0.77	43.4	4.47	7.5	0.77	8.3	0.85	10.1	1.04	30.6	3.15
47	0.77	3.23	43.6	0.08	1.1	1.17	15.8	0.86	11.6	2.06	27.9	0.8	44.4	3.29	7.7	0.57	9.4	0.7	11	0.81	27.6	2.04
48	0.73	2.87	42.2	0.06	0.9	1.16	17	0.77	11.4	1.94	28.5	0.75	42.8	2.91	7.9	0.54	10.3	0.7	10.7	0.73	28.3	1.92
49	0.63	2.76	38.8	0.05	0.7	1.09	15.4	0.87	12.2	2.34	32.9	0.69	40.9	2.9	8.7	0.62	9.2	0.65	10.3	0.73	31	2.2
50	0.73	3.22	42.3	0.08	1.1	1.02	13.4	0.95	12.4	2.34	30.8	0.78	43.8	3.33	7.2	0.55	7.5	0.57	10.7	0.81	30.9	2.35
51	0.79	3.69	44	0.08	1	1.02	12.2	0.9	10.7	2.7	32.1	0.82	45.2	3.8	4.5	0.38	8.4	0.71	10.7	0.9	31.3	2.63
52	0.67	2.69	40.2	0.09	1.4	1.1	16.4	0.81	12	2.01	30	0.76	43.1	2.89	7.8	0.52	9.2	0.62	7.4	0.5	32.5	2.18
53	0.54	2.9	34.9	0.08	1	1.33	16	1	12.1	2.99	36	0.55	35.5	2.95	8.6	0.71	9.3	0.77	10.6	0.88	36	2.99
54	0.7	3.47	41.3	0.06	0.7	1.05	12.5	0.78	9.3	3.04	36.2	0.74	42.4	3.56	6	0.5	7.3	0.61	9.2	0.77	35.2	2.96
55	0.46	2.78	31.6	0.11	1.2	1.32	15	1.07	12.1	3.53	40.1	0.51	33.8	2.97	6.7	0.59	8.3	0.73	9.5	0.84	41.8	3.68
